# Supplementary material for: Hordenine Activated Dermal Papilla Cells and Promoted Hair Regrowth by Activating Wnt Signaling Pathway
Source: MDPI journal article supplement (doi:10.3390/nu15030694), 2023-01-30
Supplement: s1 [file s1]

# Hordenine activated dermal papilla cells and promoted hair regrowth by activating Wnt Signaling pathway

Caibing Wang<sup>1</sup>, Kai Zang<sup>2</sup>, Zexin Tang<sup>1</sup>, Ting Yang<sup>1</sup>, Xiyun Ye<sup>1\*</sup>, Yongyan Dang<sup>2\*</sup>

<sup>1</sup> Institute of Biomedical Sciences, East China Normal University, Shanghai 200241, China

<sup>2</sup> Shanghai Key Laboratory of Regulatory Biology, School of Life Science, East China Normal University, Shanghai 200241, China; 51201300103@stu.ecnu.edu.cn

\* Correspondence: yydang@bio.ecnu.edu.cn (Y.D.); xyue@bio.ecnu.edu.cn (X.Y.); Tel.: +86-21-5434-5482 (X.Y.)

## Supplemental Figures and Legends

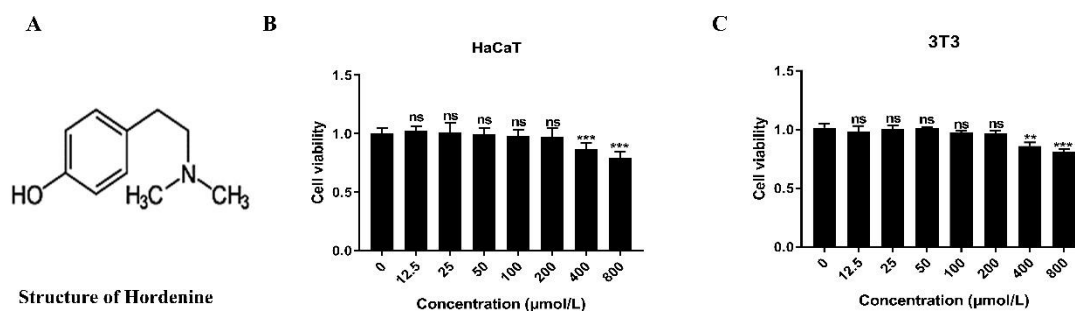

**Supplementary figure 1.** Hordenine's toxicity to epidermal and dermal cells. (A) Hordenine's structure. (B) Hordenine's toxicity to HaCaT cells and (C) 3T3 cells. HaCaT cells or 3T3 cells were treated with Hordenine range of 0-800 μM/L. Data are expressed as means ± SD. \*  $P < 0.05$ , \*\*  $P < 0.01$ , \*\*\*  $P < 0.001$ , Hordenine versus control.

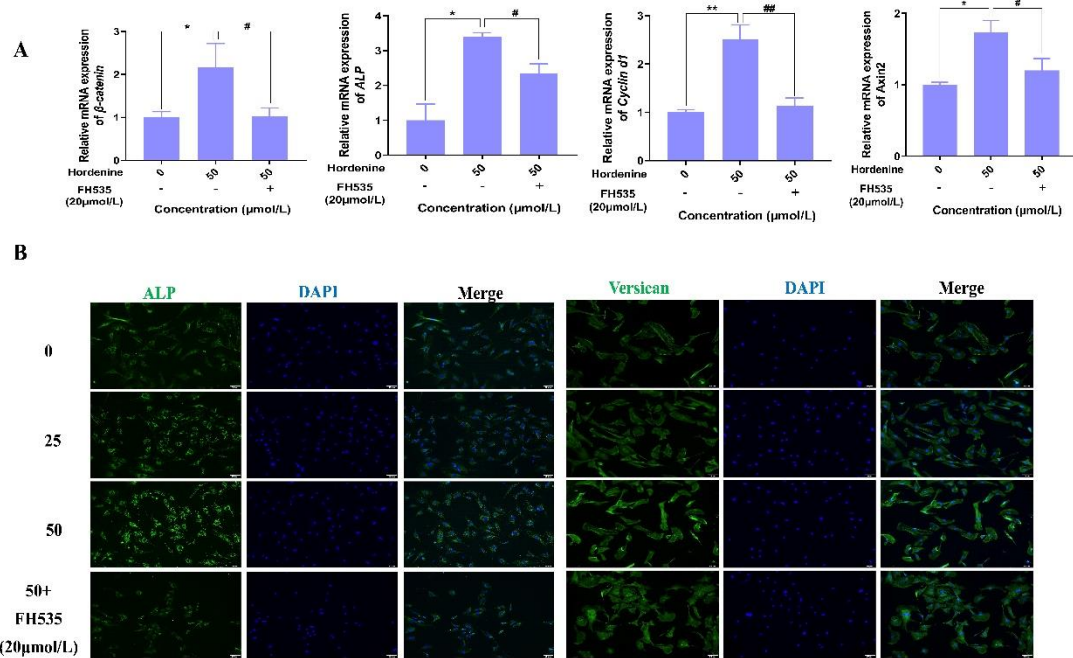

**Supplementary figure 2.** The increased activity of DPCs by Hordenine is reversed by FH535. (A) The mRNA expression of Wnt/ $\beta$ -catenin signaling pathway factors,  $\beta$ -catenin, *Lef-1*, *Cyclin d1* and *Axin2* were examined by quantitative RT-PCR. (B) Representative immunofluorescence images of ALP and Versican in DPCs treated with Hordenine in the presence or absence of FH535 (20  $\mu$ mol/L) for 24 hours. (Magnification,  $\times 200$ ; bars = 50  $\mu$ m). Data are expressed as means  $\pm$  SD. \*  $P < 0.05$ , \*\*  $P < 0.01$ , \*\*\*  $P < 0.001$ , Hordenine versus control; #  $P < 0.05$ , ##  $P < 0.01$ , Hordenine versus Hordenine plus FH535.
